# Supplementary material for: Cytotoxic, Genotoxic, and Polymorphism Effects on Vanilla planifolia Jacks ex Andrews after Long-Term Exposure to Argovit® Silver Nanoparticles
Source: PubMed Central journal article supplement (PMC6215222; doi:10.3390/nano8100754), 2018-09-25
Supplement: nanomaterials-08-00754-s001.pdf [file nanomaterials-08-00754-s001.pdf]

## Supplementary Material

# Cytotoxic, Genotoxic, and Polymorphism Effects on *Vanilla planifolia* Jacks ex Andrews after Long-Term Exposure to Silver Nanoparticles

Jericó Jabín Bello-Bello <sup>1,\*</sup>, José Luis Spinoso-Castillo <sup>2</sup>, Samantha Arano-Avalos <sup>2</sup>, Eduardo Martínez-Estrada <sup>2</sup>, María Evarista Arellano- García <sup>3</sup>, Alexey Pestryakov <sup>4</sup>, Yanis Toledano-Magaña <sup>5</sup>, Juan Carlos García-Ramos <sup>5,\*</sup> and Nina Bogdanchikova <sup>6</sup>

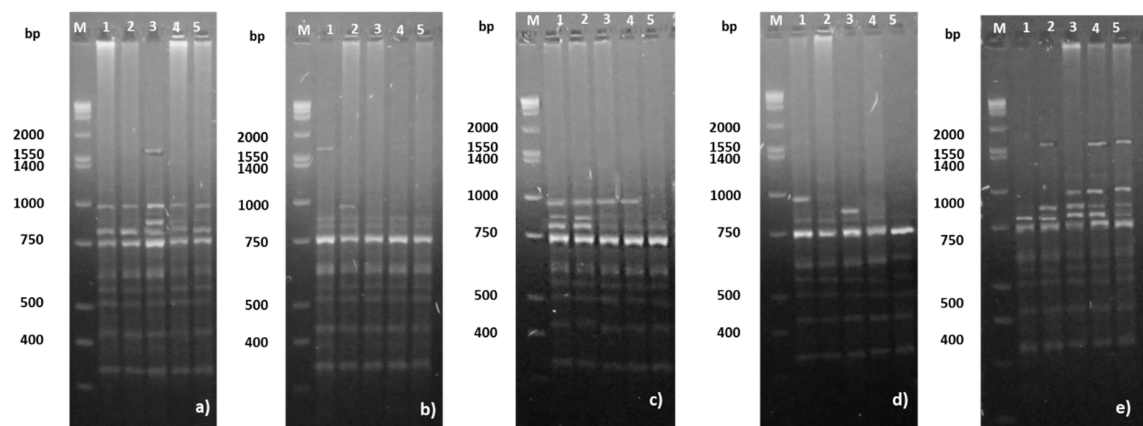

**Figure S1.** Electrophoresis pattern of ISSR banding profiles of five plants (1–5) of *V. planifolia* exposed to AgNP for six weeks on in vitro culture. The amplification for primer UBC 809 is shown. From left to right: 0, 25, 50, 100, and 200 mg/L of AgNPs, respectively. M = molecular mass marker 1 kbp plus DNA ladder; bp = base pairs.

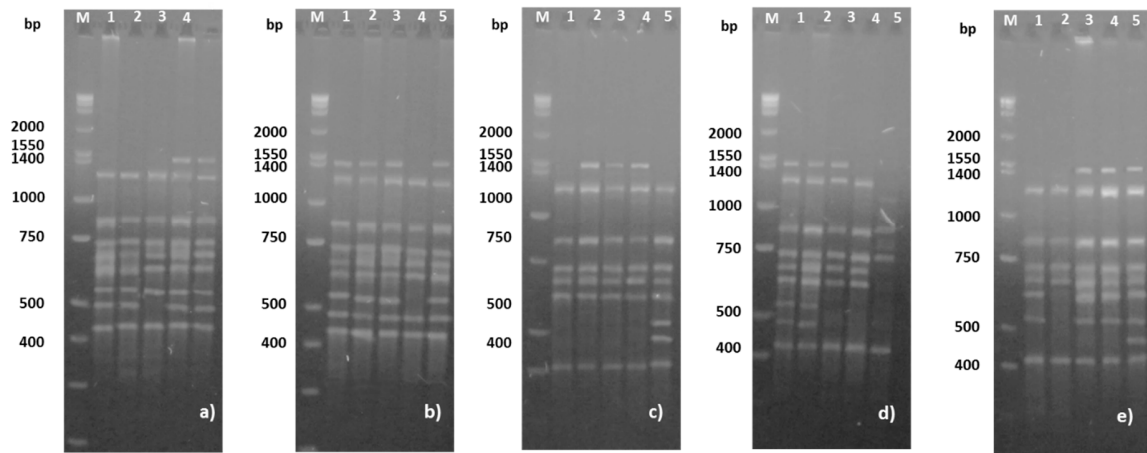

**Figure S2.** Electrophoresis pattern of ISSR banding profiles of five plants (1–5) of *V. planifolia* exposed to AgNP for six weeks on in vitro culture. The amplification for primer T06 is shown. From left to right: 0, 25, 50, 100, and 200 mg/L of AgNPs, respectively. M = molecular mass marker 1 kbp plus DNA ladder; bp = base pairs.

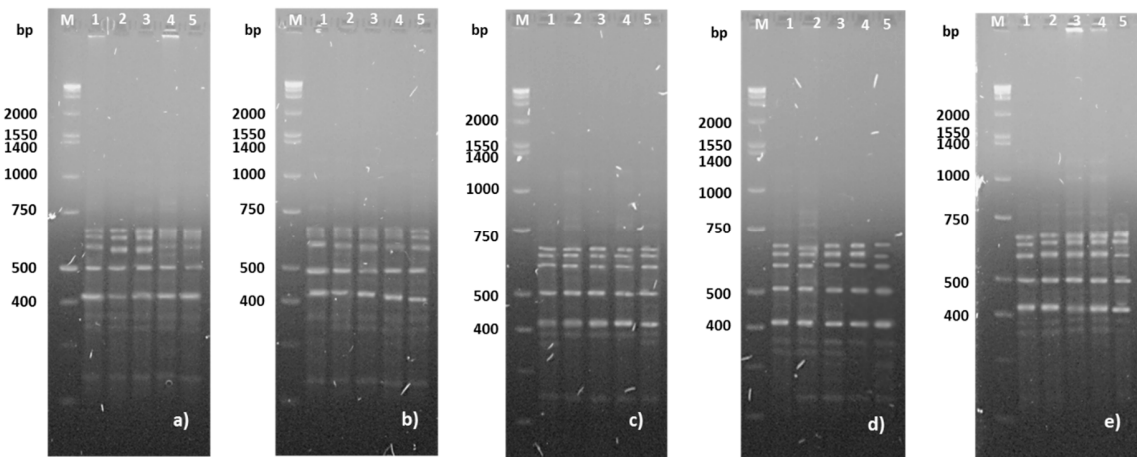

**Figure S3.** Electrophoresis pattern of ISSR banding profiles of five plants (1–5) of *V. planifolia* exposed to AgNP for six weeks on in vitro culture. The amplification for primer UBC 840 is shown. From left to right: 0, 25, 50, 100, and 200 mg/L of AgNPs, respectively. M = molecular mass marker 1 kbp plus DNA ladder; bp = base pairs.

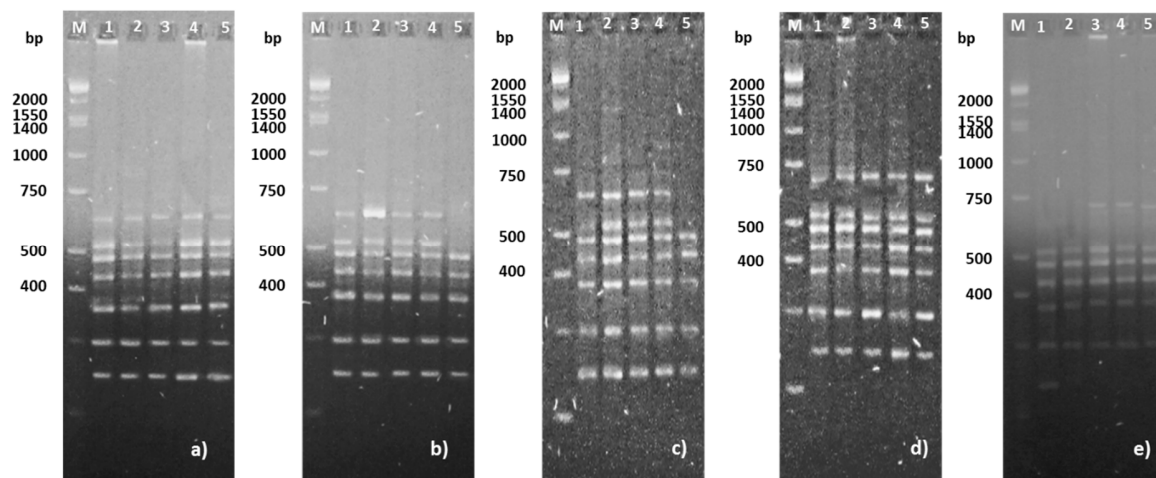

**Figure S4.** Electrophoresis pattern of ISSR banding profiles of five plants (1–5) of *V. planifolia* exposed to AgNP for six weeks on in vitro culture. The amplification for primer UBC 836 is shown. From left to right: 0, 25, 50, 100, and 200 mg/L of AgNPs, respectively. M = molecular mass marker 1 kbp plus DNA ladder; bp = base pairs.

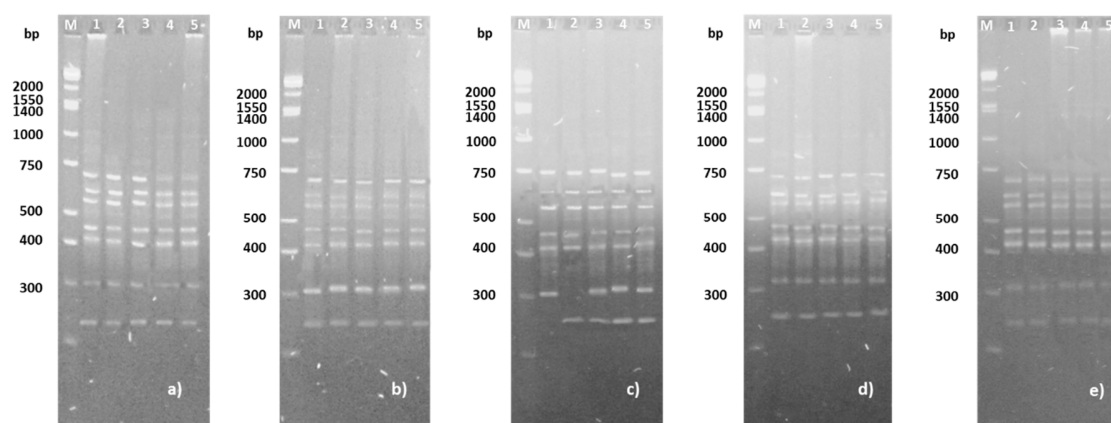

**Figure S5.** Electrophoresis pattern of ISSR banding profiles of five plants (1–5) of *V. planifolia* exposed to AgNP for six weeks on in vitro culture. The amplification for primer UBC 812 is shown. From left to right: 0, 25, 50, 100, and 200 mg/L of AgNPs, respectively. M = molecular mass marker 1 kbp plus DNA ladder; bp = base pairs.

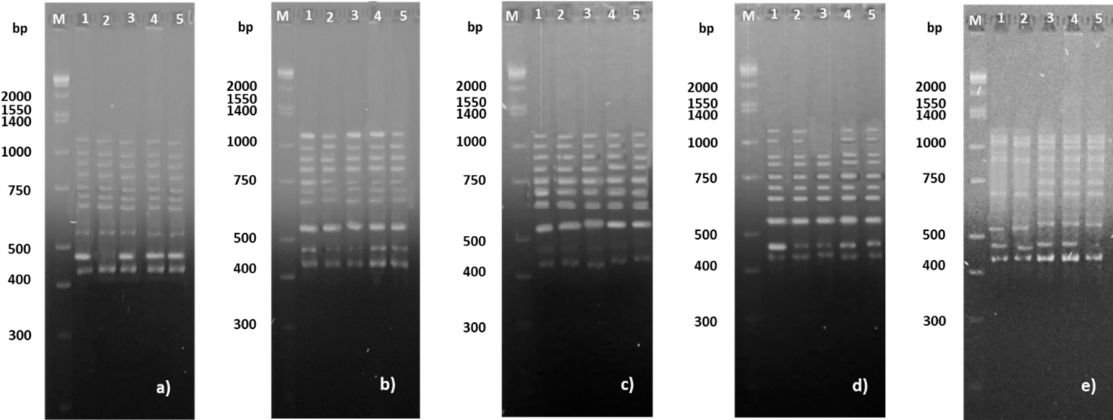

**Figure S6.** Electrophoresis pattern of ISSR banding profiles of five plants (1–5) of *V. planifolia* exposed to AgNP for six weeks on in vitro culture. The amplification for primer 808 is shown. From left to right: 0, 25, 50, 100, and 200 mg/L of AgNPs, respectively. M = molecular mass marker 1 kbp plus DNA ladder; bp = base pairs.

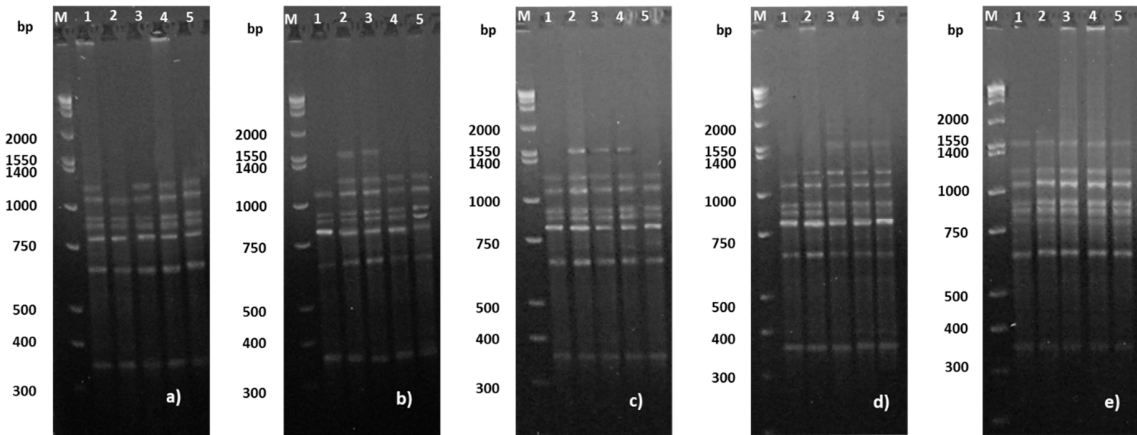

**Figure S7.** Electrophoresis pattern of ISSR banding profiles of five plants (1–5) of *V. planifolia* exposed to AgNP for six weeks on in vitro culture. The amplification for primer T05 is shown. From left to right: 0, 25, 50, 100, and 200 mg/L of AgNPs, respectively. M = molecular mass marker 1 kbp plus DNA ladder; bp = base pairs.

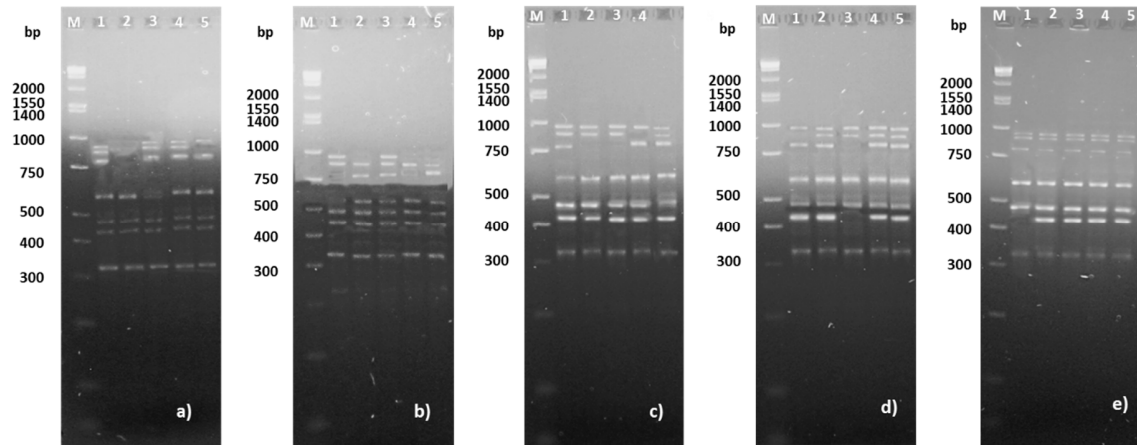

**Figure S8.** Electrophoresis pattern of ISSR banding profiles of five plants (1–5) of *V. planifolia* exposed to AgNP for six weeks on *in vitro* culture. The amplification for primer C07 is shown. From left to right: 0, 25, 50, 100, and 200 mg/L of AgNPs, respectively. M = molecular mass marker 1 kbp plus DNA ladder; bp = base pairs.
